1 **A co-produced community engagement workshop in South London to reduce psychosis related**  
2 **stigma**

3 Shujun Cai<sup>1</sup>, Joelyn N'Danga Koroma<sup>2</sup>, Charlotte Graham<sup>2</sup>, Meagan McKay<sup>3</sup>, Caroleen Bray<sup>2</sup>, Lauren  
4 Colgan<sup>2</sup>, Sarah Lynch<sup>2</sup>, Sharon Fitzell<sup>2</sup>, Isaac Akande<sup>2</sup> and Thomas J Spencer<sup>2,3\*</sup>

5  
6 <sup>1</sup>Barnet, Enfield and Haringey Mental Health NHS Trust, UK;

7 <sup>2</sup>OASIS service, South London and Maudsley NHS Foundation Trust, London, UK;

8 <sup>3</sup>Department of Psychosis Studies, Institute of Psychiatry, Psychology and Neuroscience, King's  
9 College London, De Crespigny Park, London SE5 8AF

10

11

12

13

14 \* Correspondence should be addressed to Dr Thomas Spencer, Department of Psychosis Studies,  
15 Institute of Psychiatry, Psychology and Neuroscience, King's College London, De Crespigny Park,  
16 London SE5 8AF, UK. E-mail: [tom.spencer@kcl.ac.uk](mailto:tom.spencer@kcl.ac.uk)

17

18 Abstract: 337

19 Text: 3850 (including headings and sub-headings)

20 Tables: 2

21 Figures: 3

22

23 **Abstract**

24 *Background*

25 Early access to services is essential for those suffering a psychotic illness or at risk for the condition.  
26 Lack of knowledge of services and public stigma are major barriers to care and are associated with  
27 increased duration of untreated psychosis and delays in those at clinical high-risk for psychosis (CHR-  
28 P) from accessing support. Education and contact programmes have shown promise in reducing  
29 stigmatizing views, however, few have been co-produced and delivered by service users and clinical  
30 staff. A three-hour co-produced educational workshop was developed and delivered by service users  
31 and Outreach and Support in South London (OASIS) staff. The aim was to assess the feasibility of  
32 delivering a co-produced workshop to youth community workers, to see if it improved knowledge of  
33 psychosis, attitudes to mental health services and reduced stigma towards people with psychosis as  
34 well as seeing if the workshop increased community referrals to OASIS.

35

36 *Method*

37 Educational workshops were developed by community stakeholders and service users. Pre- and post-  
38 workshop questionnaires assessed knowledge of psychosis, attitudes towards mental health teams and  
39 stigma towards individuals with a psychotic disorder. Participants' and service users' views on the  
40 workshop were explored through two focus groups.

41

42 *Results*

43 9 workshops were delivered to 75 community participants. Following the workshop participants'  
44 questionnaire scores showed improvements in knowledge of psychosis, improved attitudes towards  
45 mental health teams and a reduction in stigmatizing views towards people with psychosis. The  
46 workshop was overwhelmingly well received with 97% agreeing with the statement that they learnt  
47 something valuable from the workshop. Referrals to the OASIS service increased by 22% following  
48 the workshops.

49

50 *Conclusion*

51 The co-produced educational workshop designed and delivered by service users and OASIS staff was  
52 successful in improving participants' knowledge, attitudes and reducing stigma. We observed an  
53 increase in the rate of referrals to the OASIS service, although it is difficult to whether this was due to  
54 the workshops or to other outreach activities. Future research should examine whether these effects  
55 are long-lasting and explore online delivered workshops to reach more participants in the wider  
56 community.

57

58

59

60 Key words: Psychosis, Clinical high risk (CHR), Stigma, , Co-production, Social contact, Early  
61 intervention

62

63

64

## 65 **1. Introduction**

66 Psychotic disorders are debilitating illnesses that can severely impact the individuals, their families  
67 and society (Arciniegas, 2015). Research has shown that in many cases patients experience prodromal  
68 symptoms before they develop their first episode of psychosis, a period that may last for several years  
69 (Klosterkötter et al., 2001). These individuals have a much higher risk of developing psychosis  
70 compared to the general population and can be considered as clinical high risk for developing  
71 psychosis (CHR-P). Trained practitioners can reliably identify those at CHR-P using standardized  
72 semi-structured interviews such as the Comprehensive Assessment of At Risk Mental States  
73 (CAARMS; Yung et al., 2005) or the Structured Interview for Psychosis-Risk Syndromes (SIPS;  
74 McGlashan et al., 2010). Over the last twenty years there have been major advancements in the  
75 detection and prognosis of individuals at clinical high-risk for developing psychosis (Fusar-Poli, et al.,  
76 2020) and this approach shows promise for optimizing the benefits of early intervention in psychosis  
77 (Fusar-Poli et al., 2017).

78  
79 Early access to treatment for those experiencing psychosis is essential and is associated with  
80 improved outcomes (Correll et al., 2018) whereas delays in detection leads to worse outcomes  
81 (Perkins et al., 2005). Furthermore, young people developing psychosis are those least likely to access  
82 care through traditional means, and are therefore far more likely to receive treatment only at crisis  
83 points (Fusar-Poli, Lai, et al., 2020; Glover & Evison, 2010). Research has shown that lack of  
84 knowledge and stigma constitute significant barriers to accessing care through early intervention  
85 services (Mueser et al., 2020; Tiller et al., 2023). In their landmark study, Gronholm and colleagues  
86 (2017) identified different themes in how stigma may affect pathways to care for CHR-P individuals  
87 or those experiencing a first episode of psychosis. From their systematic review, they identified an  
88 internalised sense of difference appraised in a negative way, negative reactions from others, a lack of  
89 knowledge and feeling labelled or judged by service providers as key aspects of stigma that may be  
90 associated with delays in help-seeking and access to care.

91

92 Interventions to reduce stigmatizing beliefs about psychosis and the individuals it affects has  
93 historically come in many forms: imagined (West et al., 2015) or personal contact with service users  
94 (Villani & Kovess - Masfety, 2017), social inclusion programmes (Mazzi et al., 2018), online courses  
95 (Cheng et al., 2013), mental health literacy (Sutton et al., 2018), and brief videos (Amsalem,  
96 Markowitz, et al., 2021). Overall, meta-analyses confirm small to medium effect sizes for most  
97 intervention styles reducing stigma surrounding psychosis (Morgan et al., 2018). Historically,  
98 educational interventions have been the most common (Griffiths et al., 2014), with many providing  
99 the rationale that stigmatizing beliefs result from a lack of knowledge (Hassab Errasoul et al., 2015;  
100 Thornicroft et al., 2008). However, at least for adults, interventions that promote contact with service  
101 users, for example a service user sharing their personal recovery story, have been better at reducing  
102 stigma (Corrigan et al., 2012).

103

104 Educational workshops to reduce stigma around psychosis and improve attitudes to specialist mental  
105 health support services have been delivered in the UK (Lloyd-Evans et al., 2015), North America  
106 (Blair Irvine et al., 2012; Cheng et al., 2013) and Turkey (Bayar et al., 2009). Results varied between  
107 modest and no statistical improvements in both knowledge around psychosis and referral rates to  
108 relevant services. None of these interventions were co-produced in partnership with service users and  
109 community stakeholders from invention to delivery. Given that effective structural change between  
110 communities and services requires service users, community stakeholders and services to work in  
111 partnership (Callard et al., 2012; King & Gillard, 2019), this study presents an innovative approach to  
112 producing a de-stigmatising public health initiative.

113

114 This study aims to assess the feasibility of running co-produced and co-delivered education  
115 workshops to increase knowledge of psychosis and reduce stigma about people with psychosis in the  
116 London Boroughs of Croydon and Lewisham. The setting for this work was within the Outreach and  
117 Support Service in South London (OASIS; Fusar-Poli, Spencer, et al., 2020), a multi-disciplinary  
118 community mental health team for young people at CHR-P and part of the pan-London network for  
119 psychosis prevention (Fusar-Poli et al., 2019). The target for the workshop intervention was

120 community members working with young people who may have developed a first episode of  
121 psychosis or at risk of developing psychosis. The primary aim was to improve participants' mental  
122 health awareness and reduce stigmatizing attitudes towards people with psychosis or those individuals  
123 at CHR-P. Secondary aims were to explore community workshop participants' and service users'  
124 perception of the workshops impact, benefits, limitations, suggested improvements and hopes for  
125 educational attainment. We also compared the total number of referrals to the OASIS Croydon and  
126 OASIS Lewisham teams before and after the workshop, to see if we saw an increase in referrals from  
127 community workers.

128

## 129 **2. Methods**

### 130 *2.1. Workshop Development*

131 The workshops were developed following significant stakeholder engagement and participation. The  
132 value of co-production and peer and service user involvement is well documented and found to  
133 increase agency, self-esteem and reduce stigma (Mayer & McKenzie, 2017; Sun et al., 2022). The co-  
134 production process typically involves principles of reciprocity between partners: valuing the assets of  
135 each participant and offering incentivised opportunities for growth, developing participants' social  
136 capital and utilising community networks (Needham & Carr, 2009). With this in mind, clinical staff  
137 facilitated a group of eight service users in developing a community education programme based on  
138 the Theory of Change project management model (Breuer et al., 2016). One suggestion was to  
139 conduct educative workshops to community members. Clinical staff met with prominent community  
140 organisations within the Croydon area who echoed a recurrent theme: they recognised their  
141 knowledge of psychosis and early warning signs was limited and wanted specialist training to change  
142 this. Four OASIS clinicians worked with our community partners, the Croydon BME Forum and  
143 Croydon Off The Record, along with six service users to develop central themes of an education  
144 workshop. Two further sessions were held where OASIS clinicians and four service users refined the  
145 content, structure and activities for the educational workshop.

146

147 Once finalized, the workshop was co-delivered with OASIS service users and clinical staff and aimed  
148 to address symptoms of psychosis, stigma surrounding psychosis, identification of psychosis in others  
149 and awareness of mental health support within the local area. The workshop comprised of multiple  
150 teaching methods (see Table 1) to ensure it was engaging and accessible to a variety of learning styles  
151 and lasted three hours. All workshops included a powerpoint presentation with a total of 37 slides and  
152 was interactive throughout with question and answer sessions, an explanation of the workshop project  
153 and time for completion of questionnaires.

154

155 \*\*\* TABLE 1 ABOUT HERE \*\*\*

156

## 157 2.2. Procedure

158 The workshop aimed to reach community members working in environments with young people  
159 living in the London boroughs of Croydon and Lewisham. Researchers compiled a list of  
160 organisations (n=48) deemed to be suitable possible participants. These were identified from previous  
161 service development and community engagement activities OASIS had conducted, as well as from  
162 stakeholder guidance and directories of local services. An email including brief take-aways from the  
163 workshop was sent to managers of identified services and included a flyer with the OASIS logo,  
164 website and facts on the prevalence of psychosis. A Continuing Professional Development certificate  
165 was included to incentivise attendance. Nine workshops ran over a period of five months in 2019  
166 hosted in a community-based location organised by the OASIS clinical teams. All workshop attendees  
167 were given information sheets regarding the nature of the study prior and signed consent forms. No  
168 personal identifiable information was recorded and all participant responses were anonymized.  
169 Following the delivery of the workshops, a focus group with community participants, facilitated by  
170 OASIS clinical staff who had previously not been involved in the project, was arranged to gather  
171 feedback and to evaluate the effectiveness of the workshop. Another focus group was offered to  
172 service users who participated in both the development and delivery of the project and was facilitated  
173 by staff who knew the service users, upon their request.

174

175 2.3. *Measures*

176 The pre- and post-workshop questionnaires were adapted from Lloyd-Evans et al., (2015), which were  
177 originally based on questionnaires by Angermeyer and Matschinger to assess stigma relating to  
178 schizophrenia (Angermeyer & Matschinger, 1994, 1996, 1999). Questionnaires were adapted to  
179 increase accessibility to the project and shorten the time required for completion (see Supplementary  
180 Material for full questionnaires). The questionnaires were divided into four sets of questions to reflect  
181 our project aims:

182

183 (a) Section 1 included 17 items to assess knowledge of behaviours and feelings associated with  
184 psychosis. There with four possible responses (Strongly suggests psychosis; Can be part of  
185 psychosis; Not usually a feature on psychosis; Not certain) with higher scores indicating  
186 better knowledge. Six items containing symptoms not associated with psychosis or unusual  
187 beliefs (“red herring” questions) were interspersed with common symptoms. Correct  
188 responses for true symptoms (e.g.: feeling persecuted for no clear reason) obtained  
189 participants one point if they responded ‘Strongly suggests psychosis’ and ‘Can be part of  
190 psychosis’. Correct responses for “red herring” symptoms (e.g.: repetitive checking and  
191 cleaning) gained participants a point if they responded ‘Not usually a feature of psychosis’.  
192 Possible scores ranged from 0-17 with higher scores indicating better subject knowledge.

193

194 (b) These questions included 12 items assessing attitudes towards mental health services, rated on  
195 a five point Likert Scale with scores ranging from 12-60 (all reverse scored). Higher scores  
196 indicated more positive attitudes.

197

198 (c) These questions included 11 items to assess stigmatized beliefs around people experiencing  
199 psychosis or CHR. These statements were on a five point Likert Scale (reverse scored) with  
200 possible scores ranging from 11-55. Higher scores indicated more stigmatizing beliefs.

201



202 (d) These questions assessed identification of psychosis in others. Participants ticked ‘Yes’ or  
203 ‘No’ to whether they had worked with someone experiencing psychosis in the past year.

204

205 To examine rates of referrals to the OASIS Croydon and OASIS Lewisham teams we compared the  
206 number of referrals from the six month period before the workshops July 2018 to December 2018  
207 with the comparable six month period after the workshops, July 2019 to December 2019. Referral  
208 sources and whether clients being referred were accepted to the OASIS service were also recorded.

209

#### 210 *2.4. Statistical analysis*

211 Quantitative data were entered into SPSS for Windows version 28 (Chicago, Illinois, USA). Mean  
212 scores for the knowledge, stigma and attitudes sub-scales were calculated for both pre- and post-  
213 workshop intervention. Difference scores for these paired ordinal data were calculated by subtracting  
214 post-intervention means from pre-intervention means. Data were assessed for normality using the  
215 Kolmogorov-Smirnoff test of normality. Given that some of the sub-scales were not normally  
216 distributed, we assessed the difference scores between pre- and post-workshop questionnaires using  
217 Wilcoxon signed rank tests. The focus groups were analysed using realist explicit thematic analysis  
218 (Braun & Clarke, 2006). Speech from each focus group was transcribed and coded by one researcher  
219 (CB) then refined by other members of the research team, before themes were identified.

220

### 221 **3. Results**

#### 222 *3.1 Implementation of the workshop intervention*

223 Nine workshops were delivered and a total of 75 participants attended, their characteristics are  
224 reported in Table 2. Participants mainly worked in NHS organizations (32%), third sector  
225 organizations (29%), housing services (17%) and school and social care settings (17%) and there were  
226 more women (71%) than men.

227

228

\*\*\* TABLE 2 ABOUT HERE \*\*\*

229

230 *3.2. Evaluation of the workshops*

231 We received complete pre- and post-workshop questionnaires from 74 out of 75 participants (one  
232 participant with missing data was removed). The workshop was overwhelmingly well received with  
233 97% agreeing with the statement that they learnt something valuable from the workshop. Wilcoxon  
234 matched-pair signed rank tests of pre- and post-workshop scores revealed that participants showed  
235 modest increases in their knowledge about psychosis following the workshop (median score increased  
236 from 0.64 to 0.82;  $Z = 6.097$ ,  $p < 0.001$ ). Similarly, attitudes towards mental health services increased  
237 after the workshop intervention (median score increased from 3.83 to 4.08;  $Z = 4.938$ ,  $p < 0.001$ ) and  
238 stigma reduced (median score reduced from 2.54 to 2.32;  $Z = -4.888$ ,  $p < 0.001$ ). Medians for  
239 knowledge, attitudes and stigma scores before and after the workshop are displayed as raincloud  
240 plots (Allen et al., 2019) in Figures 1, 2 and 3 respectively.

241

242 \*\*\* FIGURES 1, 2 & 3 ABOUT HERE \*\*\*

243

244 *3.3. Participant views of the workshop intervention*

245 The participant focus group was attended by 15 community workers who had taken part in the  
246 workshops. Themes were explored around the main research questions: what were the benefits of the  
247 workshop, practical limitations and concerns, suggestions for improvements and hopes from  
248 educational attainment. All 15 participants endorsed the statement that the workshop was enjoyable  
249 and 14 out of 15 participants endorsed the statement that they learnt valuable things from the  
250 workshop. Service user collaboration was seen as important, and hearing the service user's recovery  
251 story was rated as the most enjoyable aspect of the workshop experience.

252

253 “All parts of the workshop [were] relevant to the day training. The opening shaped the  
254 discussions and the group work. I would suggest that for initial support and supporting people  
255 to seek help, this was a good approach”. Workshop participant

256

257 Another felt they gained:

258

259           “Understanding of psychosis and early warning signs, as well as what factors can trigger an  
260 episode and how common it is. Really enjoyed hearing from a service user”. Workshop  
261 participant

262

263 Community workers had a concern that people may not want to engage or participate throughout the  
264 workshop or that people may not find the benefit of attending. Discussions explored how we could  
265 incentivize the community workshops which led to us issuing a continuing professional development  
266 certificate to attendees. Participants were keen to learn more about pathways to referral and what  
267 happens within the existing pathways of care. Particular clarity around Child and Adolescent Mental  
268 Health referrals was sought. Participants appreciated how the workshop began with setting ground  
269 rules around confidentiality, which was thought of as a necessary step given the sensitive nature of the  
270 topics discussed.

271

272 Members of the focus group were keen to have simple and clear definitions and for everyone to begin  
273 the workshop by having access to the same framework for language so that the workshop is not filled  
274 with jargon. Using clear and simple language will create a more even playing field for everyone to  
275 feel their voices are heard. Participants raised the importance of including a Black and Minority  
276 Ethnic (BME) focus, especially as people from BME groups face particular challenges in accessing  
277 care (Memon et al., 2016; The Sainsbury Centre for Mental Health, 2002), having the Croydon BME  
278 forum host workshop sessions helped in this regard. Relatedly, members of the focus group wanted to  
279 consider the historical or personal perspectives people may hold regarding mental health including  
280 medical, psychological and spiritual. Suggestions included reaffirming that the workshop is being  
281 held through a particular lens of understanding. Making this differentiation clear towards the  
282 beginning of the workshop may be helpful to state intentions and provide openness to communication.

283

284 *3.4. Service user views of the workshop intervention*

285 The service user focus group was attended by 8 service users. Service users viewed themselves as  
286 equally important as staff in the development and delivery of the project, with a focus of all  
287 participants being valued and different skill-sets recognized.

288

289 “In some cases we felt more important than staff”. Service user

290

291 “Us adding to conversations was more valued”. Service user

292

293 There was a focus on personal outcomes and what matters to the individual. Service users enjoyed  
294 talking about their own experiences and being able to impact others with these experiences. Some  
295 service users described running the workshops as “cathartic”, helping them to process their emotions  
296 surrounding their unusual experiences and getting some distance so that service users could view  
297 these critically. Several service users described how the process gave them more confidence.

298

299 “Opened my eyes to my own abilities and what I could do. It developed my confidence and  
300 I’m more comfortable with myself”. Service user

301

302 A key theme was working in partnership with people service users as catalysts for change. Service  
303 users felt “valued” and that the OASIS service “followed through”. There were several suggestions  
304 for how to move the project forward including liaising with the Recovery College, or providing  
305 workshops to the general public and students at college or university. Service users were happy to be  
306 more involved with the planning and running of future workshops and services.

307

308 A final theme was the importance of building social capital; helping people become or stay part of  
309 their communities. Service users reported that building relationships with other service users has felt  
310 “really nice”, “respectful” and “understood”. Another service user reported that working together and  
311 doing workshops together had been a “validating” experience and fulfilled a goal “to meet other

312 people who had similar experiences and other like-minded people”. See Table S1 in Supplemental  
313 Material for a more detailed breakdown of themes.

314

### 315 *3.5. Referral rates before and after the workshop*

316 In the period between July 2018 to December 2018, before the workshops were run, OASIS Croydon  
317 and OASIS Lewisham received a total of 81 referrals. From July 2019 to December 2019, after the  
318 workshops run, OASIS Croydon and OASIS Lewisham received 99 referrals, an increase of 22%.  
319 Examination of whether the referrals were appropriate and accepted onto the OASIS caseload  
320 revealed a similar ratio of appropriate referrals for the periods of 2018 and 2019.

321

## 322 **4. Discussion**

### 323 *4.1. Main findings*

324 Following the co-produced workshop, participants’ questionnaire scores showed improvements in  
325 knowledge of psychosis, improved attitudes towards mental health teams and a reduction in  
326 stigmatizing views towards people with psychosis. These effects were statistically significant,  
327 although modest in size. These results replicate findings of similar simple interventions to reduce  
328 stigma towards mental health patients in community practitioners in London (Lloyd-Evans et al.,  
329 2015), adolescents in a school setting (Dillinger, 2021; Economou et al., 2014; Stuart, 2006) and  
330 licensed health care staff (Blair Irvine et al., 2012). The workshop was well-received by the majority  
331 of participants. Workshop participants gained great value from hearing the service users’ recovery  
332 stories and were able to seek answers to their questions around pathways to care. Service users taking  
333 part in the project stressed the importance of working on an equal footing with staff members, gaining  
334 confidence and building their social networks.

335

336 Referrals to the OASIS Croydon and OASIS Lewisham teams increased by 22% in the six months  
337 following the workshops, when the same periods were compared in 2018 and 2019. Referrals were  
338 judged to be of a similar quality, as a similar ratio of referrals were accepted onto the OASIS caseload  
339 before and after the workshops. It is difficult to argue that this increase in referrals is solely down to

340 the workshops as only a small number of referrals were sent by former workshop participants and it is  
341 difficult to control for other service-wide changes and other outreach activities which are a core  
342 component of CHR-P teams (Estradé et al., 2022). It was not possible to assess changes in referral  
343 rates beyond 2019, as the service was temporarily paused and staff were redeployed during the  
344 COVID-19 pandemic. Potentially this kind of educational workshop could help to break down  
345 barriers to access mental health care in the community reducing the delay for people developing  
346 psychosis to access care. Stigma is a key barrier to accessing mental health care, although a similar  
347 intervention was unable to show reductions in duration of untreated psychosis in new referrals to an  
348 early intervention service following the community awareness programme (Lloyd-Evans et al., 2015).

349

#### 350 *4.2. Strengths and limitations*

351 As far as we are aware, this is one of the few anti-stigma educational workshops that has been co-  
352 produced and co-delivered by service users and clinical staff. Key advantages of this approach are that  
353 we were able to embed contact with service users at the heart of the intervention, gaining the benefits  
354 of both an educational approach and contact with service users (Corrigan et al., 2012). The study has  
355 several limitations, however. We were only able to conduct a relatively small number of workshops  
356 (nine) reaching a small cross-section of target population. Larger studies assessing anti-stigma  
357 interventions have often utilized online approaches, for example, Blair Irvine and colleagues (2012)  
358 were able to recruit 172 licensed health care staff in their online anti-stigma education programme.  
359 Other very promising approaches have adopted videos recorded by service users. Amsalem and  
360 colleagues (Amsalem, et al., 2021) created a short online video of a person with schizophrenia  
361 describing some of their challenges. This kind of short-form video can easily be shared on social  
362 media. By using online recruitment this study was able to assess the impact of watching the video  
363 compared with a written form of the content and no intervention. The authors found robust reductions  
364 in on stigmatizing views towards people with psychosis, in several stigma domains, due to watching  
365 the video compared to the alternative or no intervention (Amsalem, et al., 2021). Furthermore, these  
366 effects persisted for 30-days in a subsequent follow-up assessment (Amsalem, Markowitz, et al.,  
367 2021). Whilst this approach can reach many more participants, it may not be as targeted to address

368 local community-specific barriers to access care as our approach did. By working with local  
369 community stakeholders and service users we were able to develop a workshop to reduce stigma and  
370 educate community participants on knowledge of psychosis and referral pathways into care. Perhaps  
371 the next step is to embrace the online format and create a co-produced online intervention complete  
372 with recorded and live components. This would enable us to reach a wider cross-section of the local  
373 community in South London and such sessions could more easily be run several times a year to  
374 address issues of rapid staff turnover in community organizations.

375

376 Another limitation of the study is that we do not have follow-up data to demonstrate whether the  
377 effects on knowledge, attitudes towards mental health services and stigma are long-lasting. Several  
378 anti-stigma interventions have shown that the effects of the intervention can be long lasting. A one-  
379 hour classroom workshop for students on mental illness stigma lead to a reduction in stigma sustained  
380 one month after the intervention (Ke et al., 2015). Similarly, a computer-based anti-stigma  
381 intervention was able to reduce stigmatizing views and improve mental illness knowledge in graduate  
382 students six months after the intervention (Finkelstein et al., 2008). In follow-up studies it would be  
383 useful to assess whether the effects of our co-produced workshop on participants' knowledge,  
384 attitudes and stigma persist in the medium or long-term.

385

#### 386 *4.2. Conclusion*

387 A co-produced educational workshop designed and delivered by service users and OASIS staff for  
388 community workers in South London lead to improvements in participants' mental health knowledge  
389 and attitudes towards mental health services as well as reducing stigmatizing views towards people  
390 with psychosis. The workshops were well received and led to many beneficial outcomes for the  
391 service users involved. We observed an increase in the number of referrals to the OASIS Croydon and  
392 OASIS Lewisham teams following the workshop, although it is hard to know how much of this was  
393 due to the workshop and how much is due to other outreach activities and changes in the service.

394

#### 395 **Ethics statement**

396 This work was assessed by the South London and Maudsley (SLaM) NHS Foundation Trust  
397 Research and Development department, who deemed that the work was a service improvement  
398 project and not research, thus it did not need ethical approval.

399

#### 400 **Author contributions**

401 CG, SF, IA and TJS designed the study. CG, MM, CB, SL, IA and SF developed and  
402 delivered the workshops. SC JNDK CB and TJS analyzed the data. SC and TJS wrote the first draft of  
403 the manuscript. CG, SF and TJS acquired funding. All authors contributed to the interpretation of  
404 results and to the manuscript.

405

#### 406 **Role of the funding source**

407 This work was supported by the a National Institute for Health Research (NIHR) Maudsley  
408 Biomedical Research Centre (BMC) funding for Research Opportunities for Nurses and Allied Health  
409 Professions awarded to CG and IA. The views expressed are those of the author(s) and not necessarily  
410 those of the NHS, KCL, SLaM, NIHR or the Department of Health. The funder had no influence on  
411 the design of the study or interpretation of the results.

412

#### 413 **Conflicts of interest statement**

414 The authors declare that the research was conducted in the absence of any commercial or  
415 financial relationships that could be construed as a potential conflict of interest.

416

#### 417 **Acknowledgements**

418 We thank the community participants, stakeholders and services users who took part and  
419 contributed to this study. We also thank the other members of the Outreach and Support in South  
420 London (OASIS) team who identified service users and community participants for recruitment into  
421 this study.

422

423



## 424 **References**

- 425 Allen, M., Poggiali, D., Whitaker, K., Marshall, T. R., & Kievit, R. A. (2019). Raincloud plots: a  
426 multi-platform tool for robust data visualization. *Wellcome Open Research*, 4(May), 63.  
427 <https://doi.org/10.12688/wellcomeopenres.15191.1>
- 428 Amsalem, D., Markowitz, J. C., Jankowski, S. E., Yang, L. H., Valeri, L., Lieff, S. A., Neria, Y., &  
429 Dixon, L. B. (2021). Sustained Effect of a Brief Video in Reducing Public Stigma Toward  
430 Individuals With Psychosis: A Randomized Controlled Trial of Young Adults. *American*  
431 *Journal of Psychiatry*, 178(7), 635–642. <https://doi.org/10.1176/APPI.AJP.2020.20091293>
- 432 Amsalem, D., Yang, L. H., Jankowski, S., Lieff, S. A., Markowitz, J. C., & Dixon, L. B. (2021).  
433 Reducing Stigma Toward Individuals with Schizophrenia Using a Brief Video: A Randomized  
434 Controlled Trial of Young Adults. *Schizophrenia Bulletin*, 47(1), 7–14.  
435 <https://doi.org/10.1093/schbul/sbaa114>
- 436 Angermeyer, M. C., & Matschinger, H. (1994). Lay beliefs about schizophrenic disorder: the results  
437 of a population survey in Germany. *Acta Psychiatrica Scandinavica*, 89((suppl. 382)), 39–45.  
438 <https://doi.org/10.1111/j.1600-0447.1994.tb05864.x>
- 439 Angermeyer, M. C., & Matschinger, H. (1996). Public attitude towards psychiatric treatment. *Acta*  
440 *Psychiatrica Scandinavica*, 94(5), 326–336. <https://doi.org/10.1111/j.1600-0447.1996.tb09868.x>
- 441 Angermeyer, M. C., & Matschinger, H. (1999). Lay Beliefs About Mental Disorders. *Soc Psychiatry*  
442 *Psychiatr Epidemiol*, 34(5), 275–281.
- 443 Arciniegas, D. B. (2015). Psychosis. *CONTINUUM Lifelong Learning in Neurology*, 21(3), 715–736.  
444 <https://doi.org/10.1212/01.CON.0000466662.89908.e7>
- 445 Bayar, M. R., Poyraz, B. Ç., Aksoy-Poyraz, C., & Ankan, M. K. (2009). Reducing mental illness  
446 stigma in mental health professionals using a web-based approach. *Israel Journal of Psychiatry*  
447 *and Related Sciences*, 46(3), 226–230.
- 448 Blair Irvine, A., Billow, M. B., Eberhage, M. G., Seeley, J. R., McMahon, E., & Bourgeois, M.  
449 (2012). Mental illness training for licensed staff in long-term care. *Issues in Mental Health*

- 450        *Nursing*, 33(3), 181–194. <https://doi.org/10.3109/01612840.2011.639482>
- 451    Braun, V., & Clarke, V. (2006). Using thematic analysis in psychology. *Qualitative Research in*  
452        *Psychology*, 3(2), 77–101. <https://doi.org/10.1191/1478088706qp063oa>
- 453    Breuer, E., Lee, L., De Silva, M., & Lund, C. (2016). Using theory of change to design and evaluate  
454        public health interventions: A systematic review. *Implementation Science*, 11(1).  
455        <https://doi.org/10.1186/s13012-016-0422-6>
- 456    Callard, F., Rose, D., & Wykes, T. (2012). Close to the bench as well as at the bedside: Involving  
457        service users in all phases of translational research. *Health Expectations*, 15(4), 389–400.  
458        <https://doi.org/10.1111/j.1369-7625.2011.00681.x>
- 459    Cheng, C., deRuiter, W. K., Howlett, A., Hanson, M. D., & Dewa, C. S. (2013). Psychosis 101:  
460        Evaluating a training programme for northern and remote youth mental health service providers.  
461        *Early Intervention in Psychiatry*, 7(4), 442–450. <https://doi.org/10.1111/eip.12044>
- 462    Correll, C. U., Galling, B., Pawar, A., Krivko, A., Bonetto, C., Ruggeri, M., Craig, T. J., Nordentoft,  
463        M., Srihari, V. H., Guloksuz, S., Hui, C. L. M., Chen, E. Y. H., Valencia, M., Juarez, F.,  
464        Robinson, D. G., Schooler, N. R., Brunette, M. F., Mueser, K. T., Rosenheck, R. A., ... Kane, J.  
465        M. (2018). Comparison of early intervention services vs treatment as usual for early-phase  
466        psychosis: A systematic review, meta-analysis, and meta-regression. *JAMA Psychiatry*, 75(6),  
467        555–565. <https://doi.org/10.1001/jamapsychiatry.2018.0623>
- 468    Corrigan, P. W., Morris, S. B., Michaels, P. J., Rafacz, J. D., & Rüsçh, N. (2012). Challenging the  
469        Public Stigma of Mental Illness: A Meta-Analysis of Outcome Studies. *Psychiatric Services*,  
470        63(10), 963–973. <https://doi.org/10.1176/appi.ps.005292011>
- 471    Dillinger, R. L. (2021). Addressing the Stigma Surrounding Serious Mental Illness in Adolescents: a  
472        Brief Intervention. *Psychiatric Quarterly*, 92(1), 161–167. [https://doi.org/10.1007/s11126-020-](https://doi.org/10.1007/s11126-020-09787-6)  
473        [09787-6](https://doi.org/10.1007/s11126-020-09787-6)
- 474    Economou, M., Peppou, L. E., Geroulanou, K., Louki, E., Tsaliagkou, I., Kolostoumpis, D., &  
475        Stefanis, C. N. (2014). The influence of an anti-stigma intervention on adolescents' attitudes to

- 476 schizophrenia: a mixed methodology approach. *Child and Adolescent Mental Health*, 19(1), 16–  
477 23.
- 478 Estradé, A., Salazar de Pablo, G., Zanotti, A., Wood, S., Fisher, H. L., & Fusar-Poli, P. (2022). Public  
479 health primary prevention implemented by clinical high-risk services for psychosis.  
480 *Translational Psychiatry*, 12(1). <https://doi.org/10.1038/s41398-022-01805-4>
- 481 Finkelstein, J., Lapshin, O., & Wasserman, E. (2008). Randomized study of different anti-stigma  
482 media. *Patient Education and Counseling*, 71(2), 204–214.  
483 <https://doi.org/10.1016/j.pec.2008.01.002>
- 484 Fusar-Poli, P., Estradé, A., Spencer, T. J., Gupta, S., Murguia-Asensio, S., Eranti, S., Wilding, K.,  
485 Andlauer, O., Buhagiar, J., Smith, M., Fitzell, S., Sear, V., Ademan, A., De Micheli, A., &  
486 McGuire, P. (2019). Pan-London Network for Psychosis-Prevention (PNP). *Frontiers in*  
487 *Psychiatry*, 10(October), 1–10. <https://doi.org/10.3389/fpsy.2019.00707>
- 488 Fusar-Poli, P., Lai, S., Di Forti, M., Iacoponi, E., Thornicroft, G., McGuire, P., & Jauhar, S. (2020).  
489 Early Intervention Services for First Episode of Psychosis in South London and the Maudsley  
490 (SLaM): 20 Years of Care and Research for Young People. *Frontiers in Psychiatry*,  
491 11(November), 1–10. <https://doi.org/10.3389/fpsy.2020.577110>
- 492 Fusar-Poli, P., McGorry, P. D., & Kane, J. M. (2017). Improving outcomes of first-episode psychosis:  
493 an overview. *World Psychiatry*, 16(3), 251–265. <https://doi.org/10.1002/wps.20446>
- 494 Fusar-Poli, P., Salazar De Pablo, G., Correll, C. U., Meyer-Lindenberg, A., Millan, M. J., Borgwardt,  
495 S., Galderisi, S., Bechdolf, A., Pfennig, A., Kessing, L. V., Van Amelsvoort, T., Nieman, D. H.,  
496 Domschke, K., Krebs, M. O., Koutsouleris, N., McGuire, P., Do, K. Q., & Arango, C. (2020).  
497 Prevention of Psychosis: Advances in Detection, Prognosis, and Intervention. *JAMA Psychiatry*,  
498 77(7), 755–765. <https://doi.org/10.1001/jamapsychiatry.2019.4779>
- 499 Fusar-Poli, P., Spencer, T., De Micheli, A., Curzi, V., Nandha, S., & McGuire, P. (2020). Outreach  
500 and support in South-London (OASIS) 2001—2020: Twenty years of early detection, prognosis  
501 and preventive care for young people at risk of psychosis. *European*

- 502 *Neuropsychopharmacology*, 39, 111–122. <https://doi.org/10.1016/j.euroneuro.2020.08.002>
- 503 Glover, G., & Evison, F. (2010). Use of new mental health services by ethnic minorities in England.  
504 England: North East Public Health Observatory. *Social Care Institute of Excellence*.
- 505 Griffiths, K. M., Carron-Arthur, B., Parsons, A., & Reid, R. (2014). Effectiveness of programs for  
506 reducing the stigma associated with mental disorders. A meta-analysis of randomized controlled  
507 trials. *World Psychiatry*, 13(2), 161–175. <https://doi.org/10.1002/wps.20129>
- 508 Gronholm, P. C., Thornicroft, G., Laurens, K. R., & Evans-Lacko, S. (2017). Mental health-related  
509 stigma and pathways to care for people at risk of psychotic disorders or experiencing first-  
510 episode psychosis: A systematic review. *Psychological Medicine*, 47(11), 1867–1879.  
511 <https://doi.org/10.1017/S0033291717000344>
- 512 Hassab Errasoul, A., Sutton, M., Doran, C., Robertson, G., Fenlon, N. P., Turner, N., & Clarke, M.  
513 (2015). Creating a curriculum on psychosis: A pilot training programme with youth workers.  
514 *Early Intervention in Psychiatry*, 9(5), 412–421. <https://doi.org/10.1111/eip.12158>
- 515 Ke, S., Lai, J., Sun, T., Yang, M. M. H., Wang, J. C. C., & Austin, J. (2015). Healthy Young Minds:  
516 The Effects of a 1-hour Classroom Workshop on Mental Illness Stigma in High School Students.  
517 *Community Mental Health Journal*, 51(3), 329–337. <https://doi.org/10.1007/s10597-014-9763-2>
- 518 King, C., & Gillard, S. (2019). Bringing together coproduction and community participatory research  
519 approaches: Using first person reflective narrative to explore coproduction and community  
520 involvement in mental health research. *Health Expectations*, 22(4), 701–708.  
521 <https://doi.org/10.1111/hex.12908>
- 522 Klosterkotter, J., Hellmich, M., Steinmeyer, E. M., & Schultze-Lutter, F. (2001). Diagnosing  
523 Schizophrenia in the Initial Prodromal Phase. *Archives of General Psychiatry*, 58, 158–164.
- 524 Lloyd-Evans, B., Sweeney, A., Hinton, M., Morant, N., Pilling, S., Leibowitz, J., Killaspy, H.,  
525 Tanskanen, S., Totman, J., Armstrong, J., & Johnson, S. (2015). Evaluation of a community  
526 awareness programme to reduce delays in referrals to early intervention services and enhance  
527 early detection of psychosis. *BMC Psychiatry*, 15(1), 1–13. <https://doi.org/10.1186/s12888-015->

- 528 0485-y
- 529 Mayer, C., & McKenzie, K. (2017). Health Social Care Comm - 2017 - Mayer - it shows that there s  
530 no limits the psychological impact of co-production for.pdf. *Health and Social Care in the*  
531 *Community*, 25(3), 1181–1189. <https://doi.org/doi:10.1111/hsc.12418>
- 532 Mazzi, F., Baccari, F., Mungal, F., Ciambellini, M., Brescancin, L., & Starace, F. (2018).  
533 Effectiveness of a social inclusion program in people with non-affective psychosis. *Community*  
534 *Mental Health Journal*, 18, 179. <https://doi.org/10.1007/s10597-020-00547-1>
- 535 McGlashan, T., Walsh, B., & Woods, S. (2010). *The psychosis-risk syndrome: Handbook for*  
536 *diagnosis and follow-up*. Oxford University Press.
- 537 Memon, A., Taylor, K., Mohebati, L. M., Sundin, J., Cooper, M., Scanlon, T., & De Visser, R. (2016).  
538 Perceived barriers to accessing mental health services among black and minority ethnic (BME)  
539 communities: A qualitative study in Southeast England. *BMJ Open*, 6(11), 1–9.  
540 <https://doi.org/10.1136/bmjopen-2016-012337>
- 541 Morgan, A. J., Reavley, N. J., Ross, A., Too, L. S., & Jorm, A. F. (2018). Interventions to reduce  
542 stigma towards people with severe mental illness: Systematic review and meta-analysis. *Journal*  
543 *of Psychiatric Research*, 103(March), 120–133. <https://doi.org/10.1016/j.jpsychires.2018.05.017>
- 544 Mueser, K., DeTore, N., Kredlow, M., Bourgeois, M., Penn, D., & Hintz, K. (2020). Clinical and  
545 demographic correlates of stigma in first-episode psychosis: the impact of duration of untreated  
546 psychosis. *Acta Psychiatrica Scandinavica*, 141, 157–166.
- 547 Needham, C., & Carr, S. (2009). Emerging evidence base for adult social care transformation. *Social*  
548 *Care Institute of Excellence, March*.  
549 <http://www.scie.org.uk/publications/briefings/files/briefing31.pdf>
- 550 Perkins, D. O., Hongbin, G., Boteva, K., & Lieberman, J. A. (2005). Relationship Between Duration  
551 of Untreated Psychosis and Outcome in First-Episode Schizophrenia : A Critical Review and  
552 Meta-Analysis. *American Journal of Psychiatry*, 162, 1785–1804.
- 553 Stuart, H. (2006). Reaching out to high school youth: The effectiveness of a video-based antistigma

- 554 program. *Canadian Journal of Psychiatry*, 51(10), 647–653.  
555 <https://doi.org/10.1177/070674370605101004>
- 556 Sun, J., Yin, X., Li, C., Liu, W., & Sun, H. (2022). Stigma and Peer-Led Interventions: A Systematic  
557 Review and Meta-Analysis. *Frontiers in Psychiatry*, 13(July), 1–12.  
558 <https://doi.org/10.3389/fpsy.2022.915617>
- 559 Sutton, M., O’Keeffe, D., Frawley, T., Madigan, K., Fanning, F., Lawlor, E., Roche, E., Kelly, A.,  
560 Turner, N., Horenstein, A., O’Callaghan, E., & Clarke, M. (2018). Feasibility of a psychosis  
561 information intervention to improve mental health literacy for professional groups in contact  
562 with young people. *Early Intervention in Psychiatry*, 12(2), 234–239.  
563 <https://doi.org/10.1111/eip.12410>
- 564 The Sainsbury Centre for Mental Health. (2002). *Breaking the Circles of Fear. A review of the*  
565 *relationship between mental health services and African and Caribbean communities*. (Vol. 33,  
566 Issue 4).
- 567 Thornicroft, G., Brohan, E., Kassam, A., & Lewis-Holmes, E. (2008). Reducing stigma and  
568 discrimination: Candidate interventions. *International Journal of Mental Health Systems*, 2, 1–7.  
569 <https://doi.org/10.1186/1752-4458-2-3>
- 570 Tiller, J., Maguire, T., & Newman-Taylor, K. (2023). Early intervention in psychosis services: A  
571 systematic review and narrative synthesis of barriers and facilitators to seeking access. *European*  
572 *Psychiatry*, 66(1). <https://doi.org/10.1192/j.eurpsy.2023.2465>
- 573 Villani, M., & Kovess - Masfety, V. (2017). Could a short training intervention modify opinions about  
574 mental illness? A case study on French health professionals. *BMC Psychiatry*, 17(1), 1–9.  
575 <https://doi.org/10.1186/s12888-017-1296-0>
- 576 West, K., Turner, R., & Levita, L. (2015). Applying imagined contact to improve physiological  
577 responses in anticipation of intergroup interactions and the perceived quality of these  
578 interactions. *Journal of Applied Social Psychology*, 45(8), 425–436.  
579 <https://doi.org/10.1111/jasp.12309>

580 Yung, A. R., Yuen, H. P., McGorry, P. D., Phillips, L. J., Kelly, D., Dell'Olio, M., Francey, S. M.,  
581 Cosgrave, E. M., Killackey, E., Stanford, C., Godfrey, K., & Buckby, J. (2005). Mapping the  
582 onset of psychosis: The Comprehensive Assessment of At-Risk Mental States. *Australian and*  
583 *New Zealand Journal of Psychiatry*, 39(11–12), 964–971. [https://doi.org/10.1111/j.1440-](https://doi.org/10.1111/j.1440-1614.2005.01714.x)  
584 [1614.2005.01714.x](https://doi.org/10.1111/j.1440-1614.2005.01714.x)  
585  
586

587 **Table 1.** Components of the workshop.  
588

| Teaching aim                                                      | Activity                                                                                                                                                                                                                   | Teaching method                                                                                                                     |
|-------------------------------------------------------------------|----------------------------------------------------------------------------------------------------------------------------------------------------------------------------------------------------------------------------|-------------------------------------------------------------------------------------------------------------------------------------|
| (a) Symptoms of psychosis                                         | Umbrella of predominant symptoms<br><br>PHASED acronym<br>( <b>P</b> aranoia, <b>H</b> allucinations, <b>A</b> ged 14-25 years, <b>S</b> peech difficulties, <b>E</b> xperiencing changes in thoughts, <b>D</b> istressed) | Presentation and slide<br><br>Slide and handout                                                                                     |
| (b) Stigma surrounding psychosis                                  | True / false examples<br><br>Unusual experiences and prevalence facts                                                                                                                                                      | Whole group interaction<br><br>Breakout group work                                                                                  |
| (c) Identifying psychosis in others                               | Ice-berg activity<br><br>Role-play<br><br>Case studies                                                                                                                                                                     | Breakout group work and slide<br><br>Breakout group work and handout<br><br>Breakout group work, handout and whole group discussion |
| (d) Attitudes towards and accessibility of mental health services | OASIS service user experience<br><br>Information on psychosis and recovery                                                                                                                                                 | Presentation and slide<br><br>Presentation and slide                                                                                |

589

590

591

592

593

594

595



596 **Table 2.** Characteristics of workshop participants.  
597

| Characteristic       |                            | N (%)    |
|----------------------|----------------------------|----------|
| Type of organisation | NHS organizations          | 24 (32%) |
|                      | Third sector organizations | 22 (29%) |
|                      | Housing services           | 13 (17%) |
|                      | Social care                | 13 (17%) |
|                      | Carers                     | 3 (4%)   |
| Gender               | Female                     | 53 (71%) |
|                      | Male                       | 22 (29%) |
| Age group            | 18-24                      | 5 (7%)   |
|                      | 25-34                      | 21 (28%) |
|                      | 35-44                      | 16 (21%) |
|                      | 45-54                      | 15 (20%) |
|                      | 54+                        | 18 (24%) |

598

599

600

601

602 **Figure 1.** Raincloud plots showing median knowledge questionnaire scores before and after  
603 the workshop. Half violin plots show probability density functions and dots show the raw  
604 data. Lines between datapoints link the same participants' before and after questionnaire  
605 scores.  
606  
607

## Knowledge scores before and after workshop

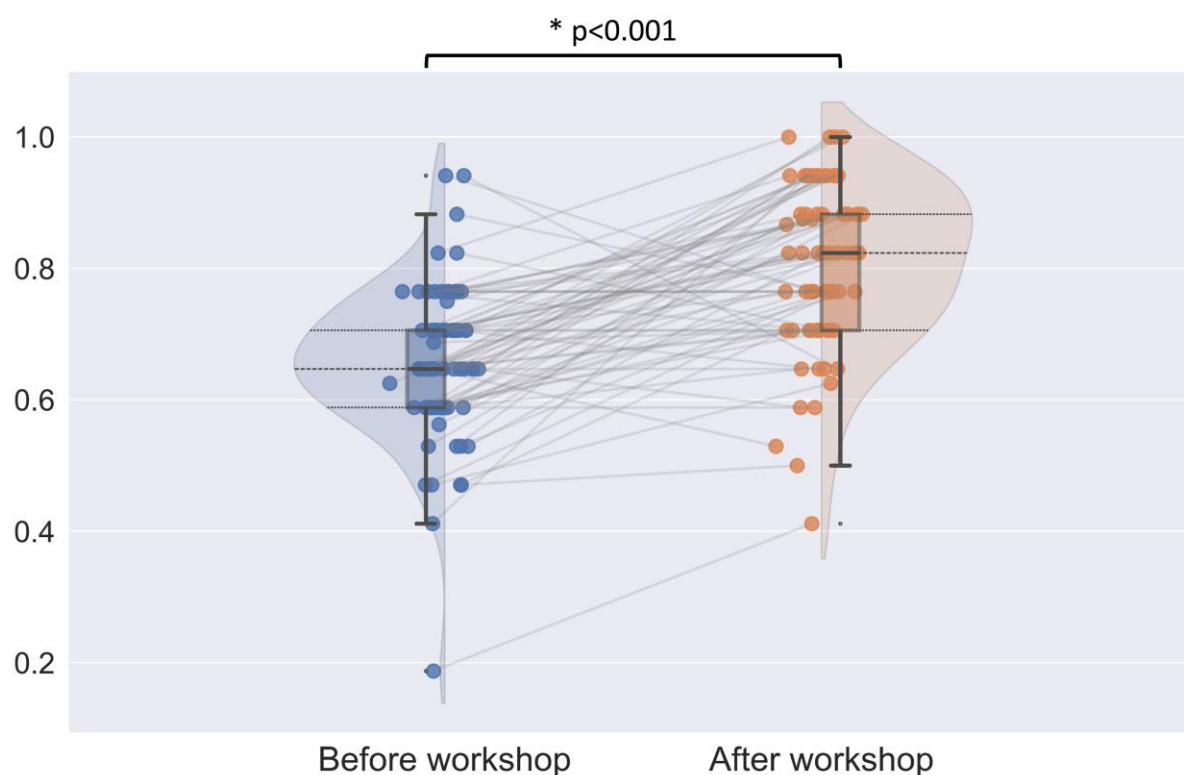

608  
609  
610  
611

612 **Figure 2.** Raincloud plots showing attitudes towards mental health services questionnaire  
613 scores before and after the workshop. Half violin plots show probability density functions and  
614 dots show the raw data. Lines between datapoints link the same participants' before and after  
615 questionnaire scores.  
616

## Attitudes towards mental health services scores before and after workshop

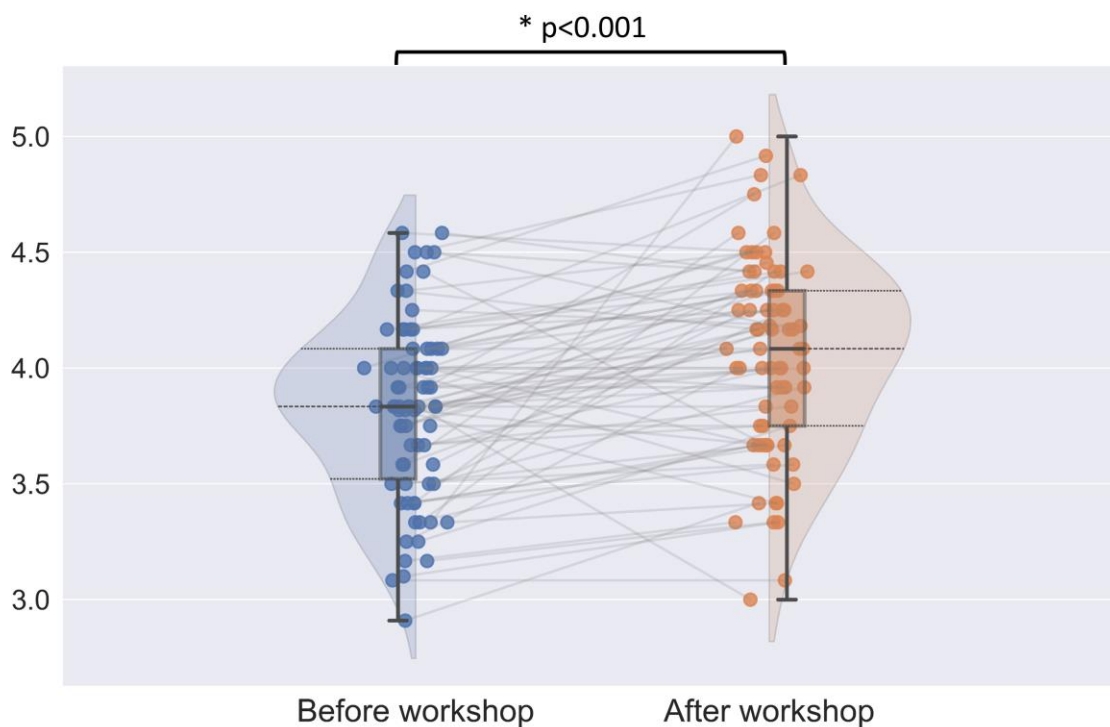

617  
618  
619  
620  
621  
622

623 **Figure 3.** Raincloud plots showing median stigma questionnaire scores before and after the  
624 workshop. Half violin plots show probability density functions and dots show the raw data.  
625 Lines between datapoints link the same participants' before and after questionnaire scores.  
626  
627

## Stigma scores before and after workshop

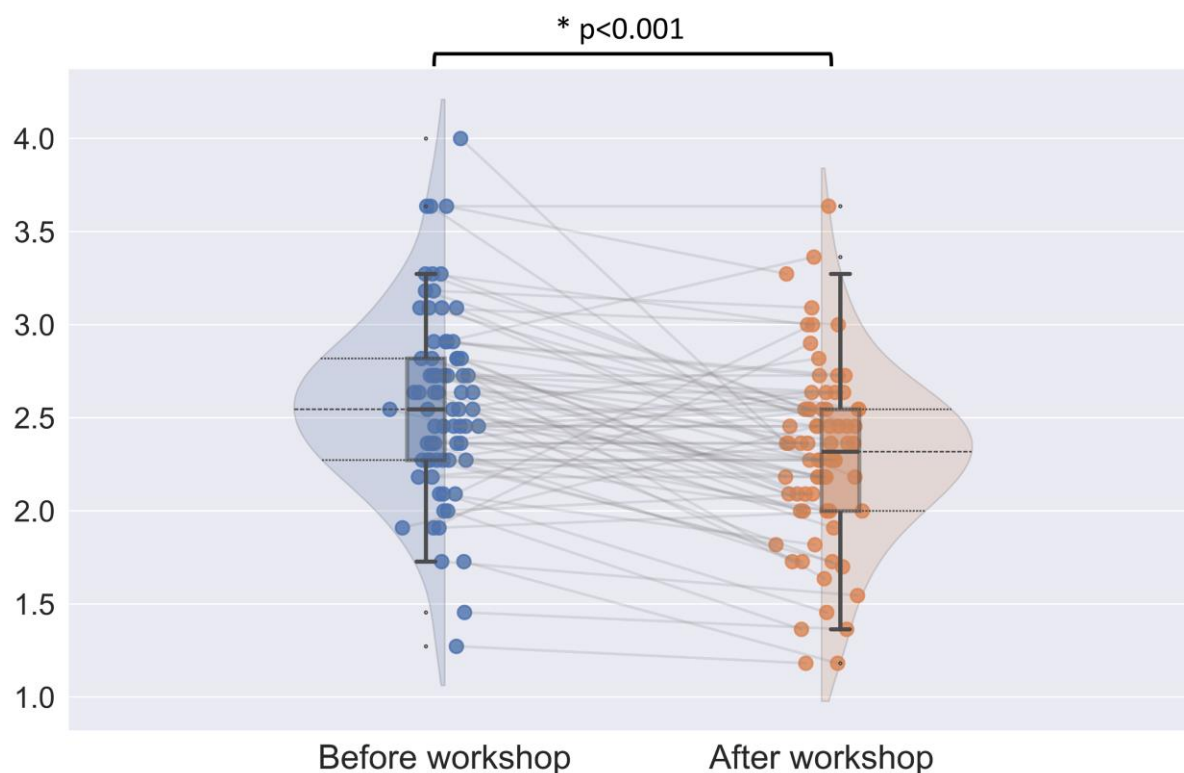

628  
629  
630

631 **Supplementary Materials**

632

633 **Table S1: Focus Group Service User Themes**

634

| <b><u>Themes</u></b>                                                                                              | <b><u>Data</u></b>                                                                                                                                                                                                                                                                                                                                                                                                                                                                                                                                                                                                                                                                                                                                                                                                                                                                                                                                       |
|-------------------------------------------------------------------------------------------------------------------|----------------------------------------------------------------------------------------------------------------------------------------------------------------------------------------------------------------------------------------------------------------------------------------------------------------------------------------------------------------------------------------------------------------------------------------------------------------------------------------------------------------------------------------------------------------------------------------------------------------------------------------------------------------------------------------------------------------------------------------------------------------------------------------------------------------------------------------------------------------------------------------------------------------------------------------------------------|
| <p><b>Strengths / Partnership</b><br/> <i>All participants are valued and different skill-sets recognised</i></p> | <ul style="list-style-type: none"> <li>• Seen as equally important as staff and service in the development and delivery of the project</li> <li>• “In some cases we felt more important than staff”</li> <li>• “Us adding to conversations was more valued”</li> <li>• Working together service user expertise and clinical expertise went well together; this helped people’s understanding of the content</li> <li>• Project didn’t move forward until service users felt comfortable and skilled</li> <li>• “Laid-back” approach with OASIS staff; dynamic and rapport good. Personal values aligned with those of the service. Felt like staff and service users are equals and friendly with one another yet professional relationship. This dynamic impacted on how the participants received information (in contrast to a lecture).</li> <li>• Have felt supported by one another (in the facilitation process of managing the group)</li> </ul> |
| <p><b>Shared roles / capacity</b></p>                                                                             | <ul style="list-style-type: none"> <li>• Staff to put boundaries up in terms of what questions to ask with each workshop (depending on mental state that day of service user)</li> <li>• Staff to arrange a check in before and after each workshop re. personal triggers to ensure service users don’t feel abandoned</li> <li>• Monthly supervision group moving forward as would have been helpful particularly after the first few workshops; sometimes service users don’t have others to talk to about their wellbeing so could use this space for that too</li> </ul>                                                                                                                                                                                                                                                                                                                                                                             |

|                                                                                                                                                                          |                                                                                                                                                                                                                                                                                                                                                                                                                                                                                                                                                                                                                                                                                                                                                                                                                                                                                                                                                                                                                                                                                                                                                                                                                                                                                                                                                                                                          |
|--------------------------------------------------------------------------------------------------------------------------------------------------------------------------|----------------------------------------------------------------------------------------------------------------------------------------------------------------------------------------------------------------------------------------------------------------------------------------------------------------------------------------------------------------------------------------------------------------------------------------------------------------------------------------------------------------------------------------------------------------------------------------------------------------------------------------------------------------------------------------------------------------------------------------------------------------------------------------------------------------------------------------------------------------------------------------------------------------------------------------------------------------------------------------------------------------------------------------------------------------------------------------------------------------------------------------------------------------------------------------------------------------------------------------------------------------------------------------------------------------------------------------------------------------------------------------------------------|
|                                                                                                                                                                          | <ul style="list-style-type: none"> <li>• OASIS staff always calming and always make us feel comfortable: staff talk to us like we are human, make us feel seen and value us like friends</li> <li>• Felt normal, not forced</li> <li>• OASIS staff bring service users up → not top down.</li> </ul>                                                                                                                                                                                                                                                                                                                                                                                                                                                                                                                                                                                                                                                                                                                                                                                                                                                                                                                                                                                                                                                                                                     |
| <p><b>Outcomes</b><br/> <i>Focus on personal outcomes – what matters to the individual</i></p>                                                                           | <ul style="list-style-type: none"> <li>• Enjoyed talking about own experiences and working in a dynamic setting</li> <li>• Enjoy educating and able to impact others with own experiences – would like to do more of this in the future</li> <li>• Enjoyed seeing other peoples’ responses and found peoples’ reactions to be positive which made service users feel this was a worthwhile exercise</li> <li>• “Cathartic” process. It helped process emotions surrounding the unusual experiences and getting some distance so that service users could view these critically.</li> <li>• Helped overcome difficulties and the reflection process. Helped acknowledge and validate the experiences. Initially the unusual experiences worsened</li> <li>• This experience has built confidence to apply for other jobs and build on own business and own events.</li> <li>• “Opened my eyes to my own abilities and what I could do. It developed my confidence and I’m more comfortable with myself”</li> <li>• Made me feel like I’m normal and anyone can have these experiences</li> <li>• Didn’t judge people as much as I expected</li> <li>• Unsurprised by “silly things” people said. Recognised some people in audience. Some reluctance from Black and Minority Ethnic groups; felt able to emulate OASIS staff emotional responses</li> <li>• Learnt new things around psychosis</li> </ul> |
| <p><b>Catalysts for change</b><br/> <i>Working in partnership with people who use the service as catalysts for change (delivery, design, evaluation of projects)</i></p> | <ul style="list-style-type: none"> <li>• OASIS service clearly wanted service users involved; from Theory of Change, to producing the workshop to delivering it, service users felt “valued” and OASIS service “followed through”.</li> <li>• Achieved definition of “co-production” and was “very much co-produced”</li> <li>• Definitely a role for the project to move forward – suggest to focus on general public workshops rather than organisations, or work places for</li> </ul>                                                                                                                                                                                                                                                                                                                                                                                                                                                                                                                                                                                                                                                                                                                                                                                                                                                                                                                |

|                                                                                                                                                                                                                                      |                                                                                                                                                                                                                                                                                                                                                                                                                                                                                                                                                                                                                                                                                                                                                                                                                                                                                                                                                                                                                                                                                                                                                                                                                                   |
|--------------------------------------------------------------------------------------------------------------------------------------------------------------------------------------------------------------------------------------|-----------------------------------------------------------------------------------------------------------------------------------------------------------------------------------------------------------------------------------------------------------------------------------------------------------------------------------------------------------------------------------------------------------------------------------------------------------------------------------------------------------------------------------------------------------------------------------------------------------------------------------------------------------------------------------------------------------------------------------------------------------------------------------------------------------------------------------------------------------------------------------------------------------------------------------------------------------------------------------------------------------------------------------------------------------------------------------------------------------------------------------------------------------------------------------------------------------------------------------|
|                                                                                                                                                                                                                                      | <p>staff to be better supported, in schools to teach staff for more preventative work.</p> <ul style="list-style-type: none"> <li>• Promotion: suggestions to continue on a bigger scale to liaise with Recovery College, to colleges and universities (with a focus on exam stress GCSEs / A-Levels)</li> <li>• Would want the project to continue with an OASIS staff member and service user</li> <li>• Suggestion for frequent involvement</li> <li>• Service users happy to be more involved with the planning</li> <li>• Service users to be paid more than current month and at the end of the month</li> <li>• Up to 30 people was appropriate; venue not relevant but need freedom to set up / layout the room as we wish</li> <li>• More important than the content was that we were caring</li> <li>• Suggestions for change in workshop content: too many activities in same order; to be spaced out with service user presentation / talk. Check in with knowledge first. Pre and post question of what psychosis is. Questionnaires too long and this took too much time and felt as though people were sceptical/ mistrustful of the research element. Outcomes helpful, make sure these are anonymous.</li> </ul> |
| <p><b>Networks / relationships</b><br/> <i>Peer-support networks developed and social capital built; helping people become or stay part of their communities</i><br/> <i>Relationships are built on equality and reciprocity</i></p> | <ul style="list-style-type: none"> <li>• Building relationships with other service users has felt “really nice”, “respectful”, understood.</li> <li>• Had been a goal to meet other people who had similar experiences and other like-minded people.</li> <li>• Working together and doing workshops together has been a “validating” experience. Recognises that not all experiences are the same as well.</li> <li>• Want to take on more challenges with NHS Trusts.</li> <li>• The project has been in line with my “values”.</li> </ul>                                                                                                                                                                                                                                                                                                                                                                                                                                                                                                                                                                                                                                                                                      |
